# Supplementary material for: Lactococcus lactis subsp. cremoris YRC3780 modifies function of mesenteric lymph node dendritic cells to modulate the balance of T cell differentiation inducing regulatory T cells
Source: Frontiers journal article supplement (doi:10.3389/fimmu.2024.1395380), 2024-07-08
Supplement: Data_Sheet_1.PDF [file Data_Sheet_1.PDF]

## *Supplementary Material*

### **Supplementary Table**

The sequences of the primers used are shown below.

---

#### *Gapdh*

Forward 5'- TGT CCG TCG TGG ATC TGA C -3'

Reverse 5'- CCT GCT TCA CCA CCT TCT TG -3'

#### *Aldh1a2*

Forward 5'- GAC TTG TAG CAG CTG TCT TCA CT -3'

Reverse 5'- TCA CCC ATT TCT CTC CCA TTT CC -3'

#### *Itgav*

Forward 5'- GAG GGA GAT GTT CAC ACT TTG -3'

Reverse 5'- AGC AGG GAT TTC ACG TAC AG -3'

#### *Itgb8*

Forward 5'- TGT ACT GAT CCC AGA AGC ATT G -3'

Reverse 5'- TGG GCC AGA AAA CAT TCT GAT -3'

#### *Tgfb1*

Forward 5'- GGA CTC TCC ACC TGC AAG AC -3'

Reverse 5'- GAC TGG CGA GCC TTA GTT TG -3'

#### *Il10*

Forward 5'- CCC AGA AAT CAA GGA GCA TTT G -3'

Reverse 5'- CAT GTA TGC TTC TAT GCA GTT G -3'

*Il4*

Forward 5'- GGT CTC AAC CCC CAG CTA GT -3'

Reverse 5'- GCC GAT GAT CTC TCT CAA GTG AT -3'

*Ifng*

Forward 5'- GCC ACG GCA CAG TCA TTG A -3'

Reverse 5'- TGC TGA TGG CCT GAT TGT CTT -3'

*Foxp3*

Forward 5'- CCC ATC CCC AGG AGT CTT G -3'

Reverse 5'- ACC ATG ACT AGG GGC ACT GTA -3'

*Gata3*

Forward 5'- GAA GGC ATC CAG ACC CGA AAC -3'

Reverse 5'- ACC CAT GGC GGT GAC CAT GC -3'

*Tbx21*

Forward 5'- CCA ACT GTC AAC TGC TTG G -3'

Reverse 5'- CCG CTT CAT AAC TGT GTT CC -3'

*Il18r1*

Forward 5'- CAC TGT CTT CTG CTG TCT GGA -3'

Reverse 5'- GAT GCA TGT TTA GGC TTC CAC -3'

*Ccr8*

Forward 5'- GCA GTC TTT GAG GTG GAA GC -3'

Reverse 5'- GAT GGC TCT GGT CCT GTT GT -3'

---

## Supplementary Figure S1

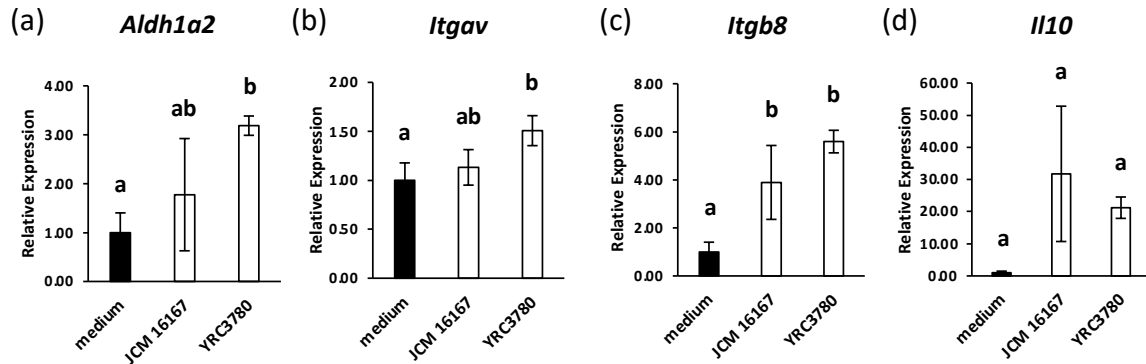

**Supplementary Figure S1.** The effect of *L. cremoris* JCM 16167 on the gene expression of Treg-inducing factors in MLN DC cultures.

MLN DC from BALB/c mice were cultured in the presence (10  $\mu$ g/mL) of *L. cremoris* JCM 16167, *L. cremoris* YRC3780 or absence of bacterial preparation. Gene expression of *Aldh1a2* (a), *Itgav* (b), *Itgb8* (c) and *Il10* (d) was measured by qRT-PCR. Tukey's HSD test was used for statistical analysis. Values not sharing a common letter are significantly different.

Supplementary Figure S2

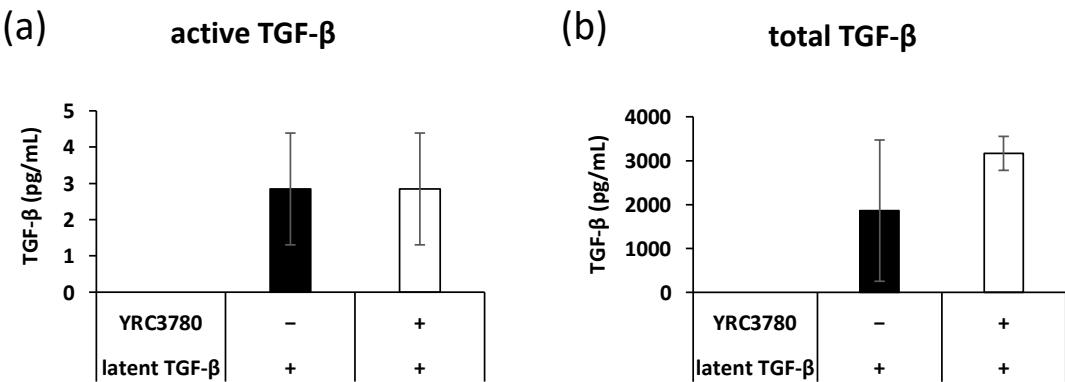

**Supplementary Figure S2.** Effects of *L. cremoris* YRC3780 on production of TGF-β in MLN DC cultures.

CD11c<sup>+</sup>DCs from the MLNs of BALB/c mice were cultured in the presence (100 μg/mL) or absence of *L. cremoris* YRC3780 and latent TGF-β (10 ng/mL). The amounts of active (a) or total (b) TGF-β1 in the supernatants were analyzed by ELISA. Student's *t*-test was used for statistical analysis.

## Supplementary Figure S3

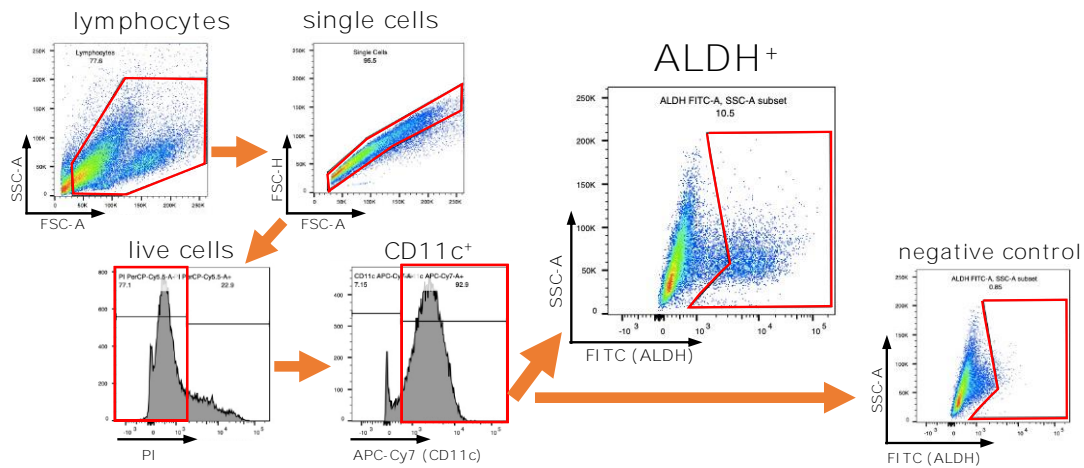

**Supplementary Figure S3.** Gating strategy used to identify ALDH<sup>+</sup> cells among live CD11c<sup>+</sup>DCs. CD11c<sup>+</sup> cells were gated from single live lymphocytes and then ALDH<sup>+</sup> cells were gated by measuring FITC. A negative control for ALDH<sup>+</sup> was prepared by the addition of DEAB. The percentage of ALDH<sup>+</sup>DCs was analyzed.

## Supplementary Figure S4

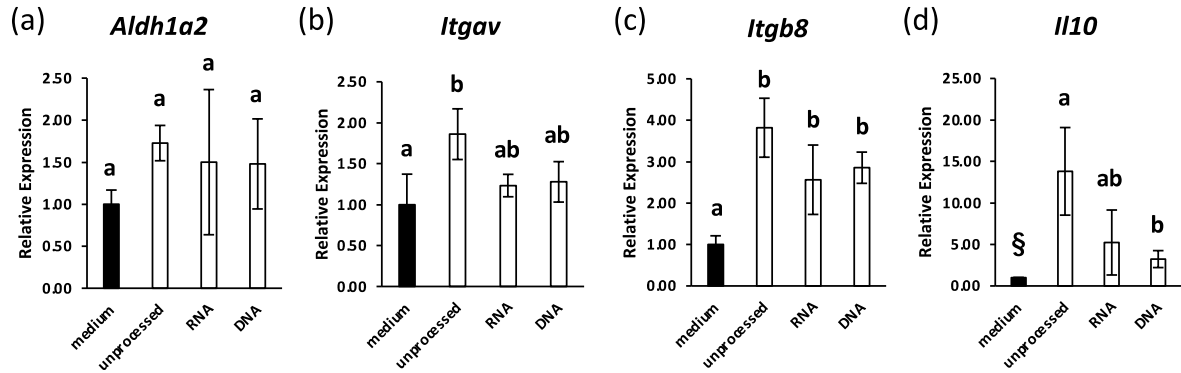

**Supplementary Figure S4** Effects of cytoplasm, RNA and DNA fractions of *L. cremoris* YRC3780 on the gene expression of Treg-inducing factors in MLN DC cultures.

MLN DCs from BALB/c mice were cultured in the presence or absence of unprocessed *L. cremoris* YRC3780 or RNA or DNA fractions of *L. cremoris* YRC3780 (10 µg/mL). Gene expression of *Aldh1a2* (a), *Itgav* (b), *Itgb8* (c) and *Il10* (d) was measured by qRT-PCR. Tukey's HSD test was used for statistical analysis. Values not sharing a common letter are significantly different. § : one of the three wells were not detected.

**Supplementary Figure S5**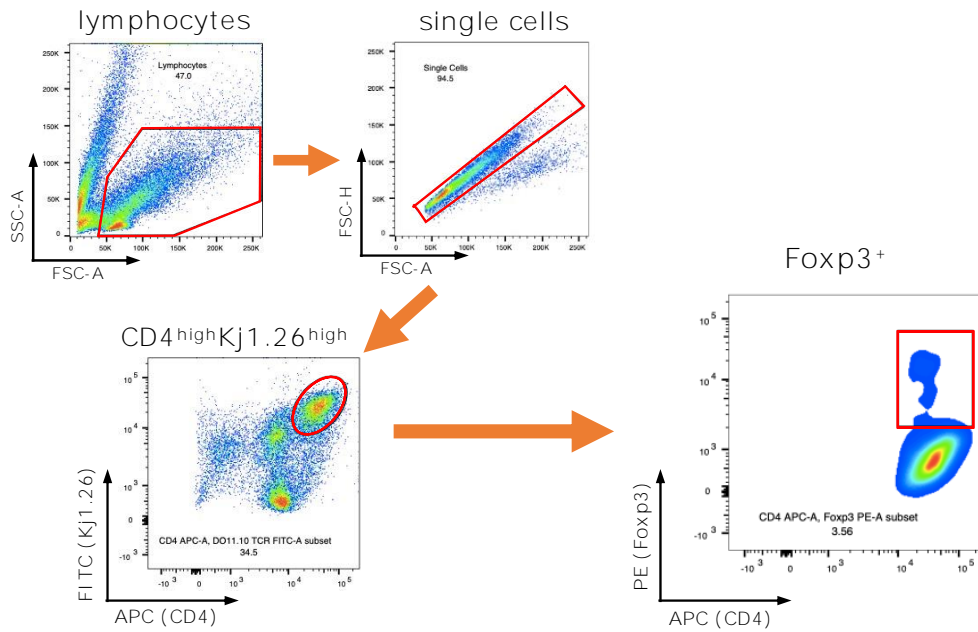**Supplementary Figure S5.** Gating strategy used to identify Foxp3<sup>+</sup>CD4<sup>+</sup>T cells.

CD4<sup>high</sup>Kj1.26<sup>high</sup> cells were gated from single lymphocytes and the percentage of Foxp3-expressing cells was analyzed.



## Supplementary Figure S6

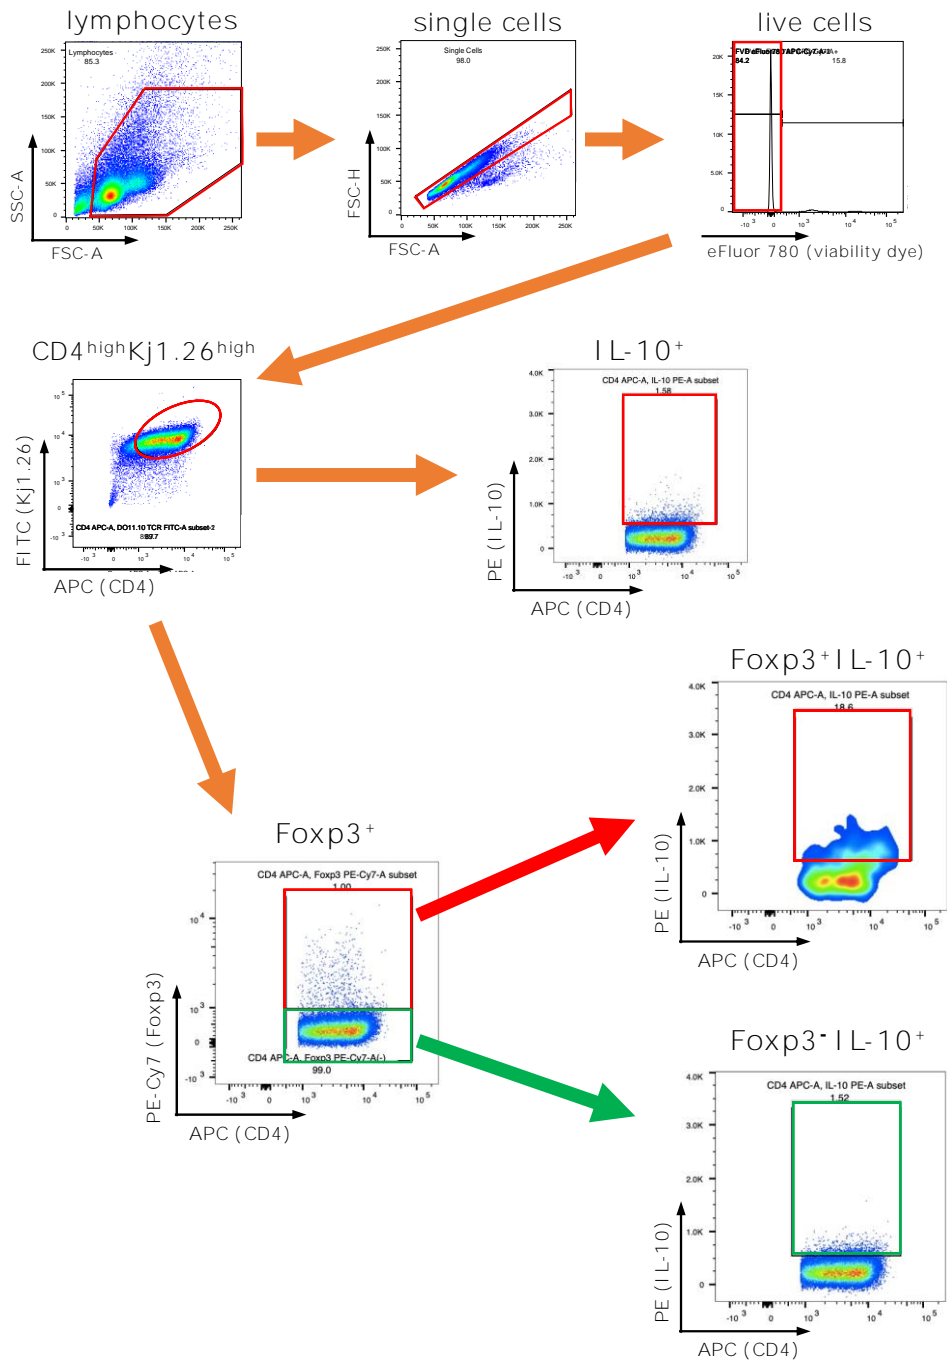

**Supplementary Figure S6.** Gating strategy used to identify IL-10<sup>+</sup>, Foxp3<sup>+</sup>IL-10<sup>+</sup> and Foxp3<sup>-</sup>IL-10<sup>+</sup> CD4<sup>+</sup>T cells.

CD4<sup>high</sup>Kj1.26<sup>high</sup> cells were gated from single live lymphocytes and the percentage of IL-10<sup>+</sup>, Foxp3<sup>+</sup>IL-10<sup>+</sup> and Foxp3<sup>-</sup>IL-10<sup>+</sup> cells was analyzed.
